# Supplementary material
Source: PubMed Central journal article supplement (PMC4604016)
Supplement: NIHMS681970-supplement-Supplemental_Digital_Content_2.pdf [file NIHMS681970-supplement-Supplemental_Digital_Content_2.pdf]

## Supplemental Digital Content 2.

*Table of antibodies and protocols used for immunohistochemistry.*

| Antibody | Supplier      | Catalogue #   | Host   | Clone      | Staining Platform       | Detection System | Antigen Retrieval | 1° Antibody          | 2° Antibody                  |
|----------|---------------|---------------|--------|------------|-------------------------|------------------|-------------------|----------------------|------------------------------|
| HNF1B    | Sigma-Aldrich | HPA002083     | Rabbit | Polyclonal | Ventana Discovery Ultra | DAB Map          | CC1, 64 min       | 1:250, 1 hr, 37C     | Universal Secondary, 32 min  |
| P16      | Ventana       | 705-4713      | Mouse  | E6H4       | Ventana Discovery Ultra | ChromoMap DAB    | CC1, 64 min       | heat, 20 min, 36C    | UltraMap anti-Ms HRP, 16 min |
| P53      | Dako          | M7001         | Mouse  | DO-7       | Ventana Discovery Ultra | DAB Map          | CC1, 64 min       | 1:400, 1 hr, 37C     | Universal Secondary, 32 min  |
| PR       | Ventana       | 790-2223      | Rabbit | 1E2        | Ventana Discovery Ultra | DAB Map          | CC1, 64 min       | heat, 16 min, 36C    | Universal Secondary, 32 min  |
| TFF3     | Abnova        | H00007033-M01 | Mouse  | 3D9        | Ventana Discovery XT    | DAB Map          | CC2, Standard     | 1:50, 1 hr, heat     | Universal Secondary, 32 min  |
| Vimentin | Zymed         | 18-0052       | Mouse  | V9         | Ventana Discovery XT    | DAB Map          | CC2, Mild         | 1:50, 32 min, heat   | Universal Secondary, 32 min  |
| WT1      | Dako          | M3561         | Mouse  | 6F-H2      | Ventana Discovery Ultra | DAB Map          | CC1, 64 min       | 1:50, 1 hr, 37C      | Universal Secondary, 32 min  |
| ARID1A   | Sigma-Aldrich | HPA005456     | Rabbit | Polyclonal | Ventana Discovery Ultra | ChromoMap DAB    | CC1, 64 min       | 1:100, 1 hr, no heat | UltraMap anti-Rb HRP, 16 min |

### **Abbreviations:**

CC1, Ventana Cell Conditioning 1 (EDTA/EGTA based)

CC2, Ventana Cell Conditioning 2 (Citrate based)

“Standard” and “Mild” refer to pre-programmed antigen retrieval steps available on the Ventana Discovery XT platform

Rb, Rabbit

Ms, Mouse

HRP, horseradish peroxidase (conjugated secondary antibody)

ARID1A, HNF1B, WT1 and PR were stained as positive or negative using a cutoff of 40% of cells staining with nuclear positivity at any intensity.

Vimentin and TFF3 were stained as positive or negative using a cutoff of 40% of cells staining with cytoplasmic and/or nuclear positivity at any intensity.

p16 (CDKN2A) positive staining was defined as 75% of tumor cells showing strong cytoplasmic and nuclear staining.

p53 (TP53) was scored on a three-tiered system. Score 0, showing a complete absence of staining in any tumor cells; score 1 showing from 1-60% positive nuclear staining of tumor cells; score 3; showing greater than 60% nuclear staining of tumor cells with most nuclei at high intensity positivity.
