# Supplementary material
Source: PubMed Central journal article supplement (PMC4604016)

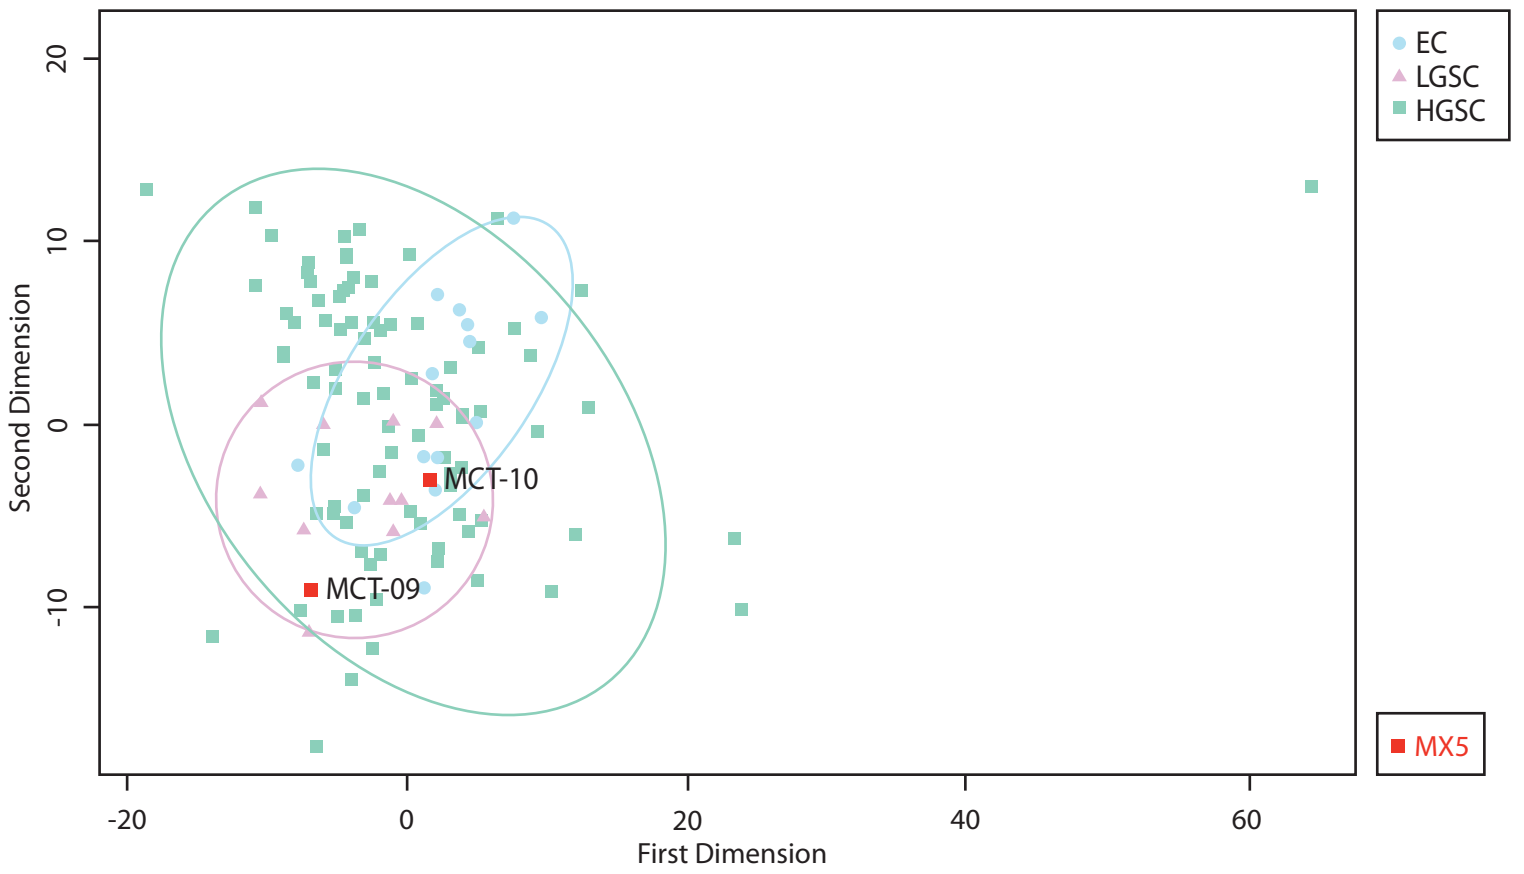

Supplement: NIHMS681970-supplement-Supplemental_Digital_Content_3.pdf [file NIHMS681970-supplement-Supplemental_Digital_Content_3.pdf]

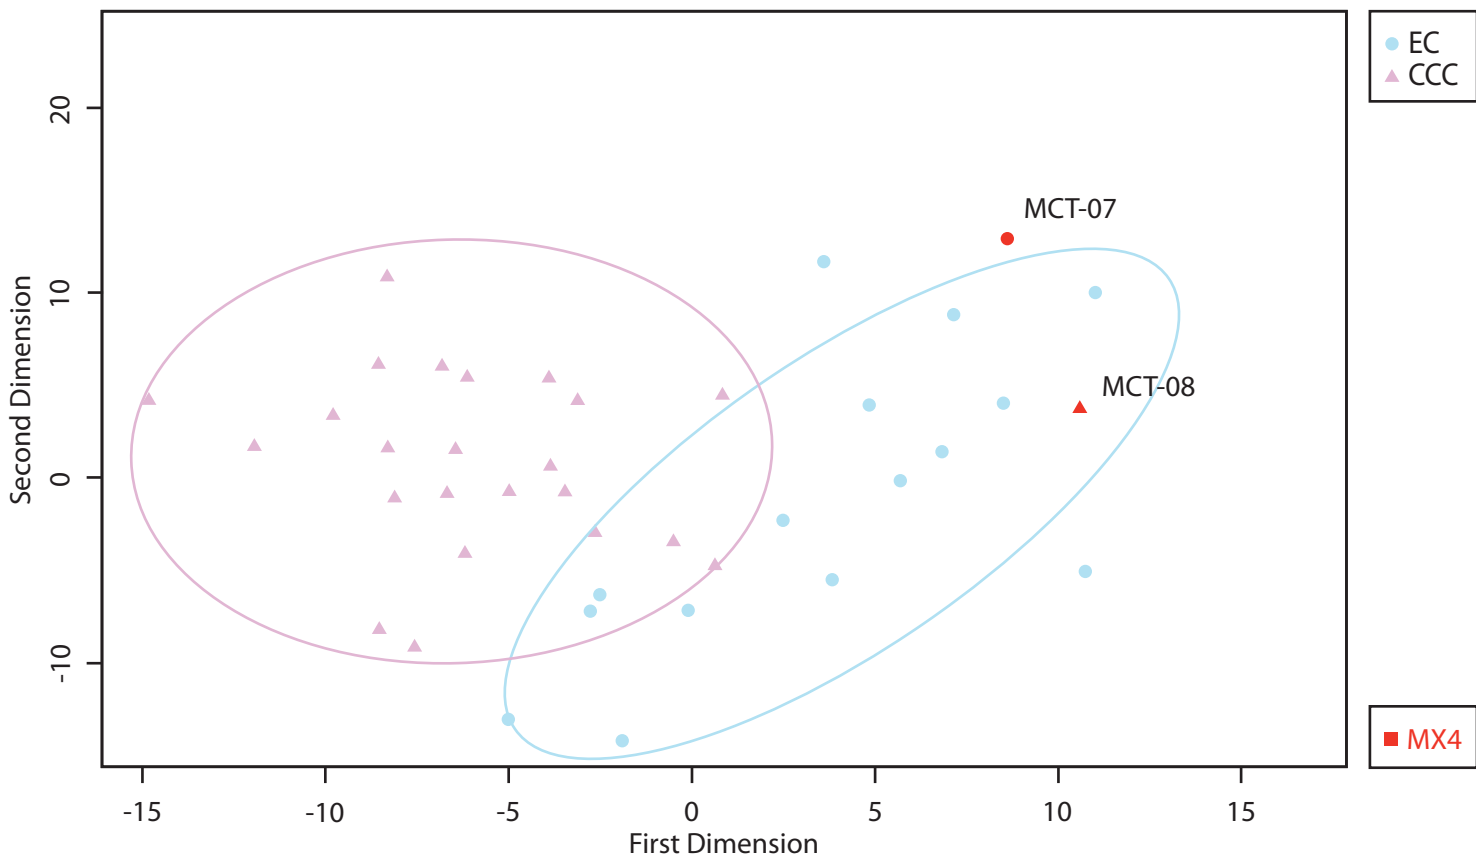

Supplement: NIHMS681970-supplement-Supplemental_Digital_Content_4.pdf [file NIHMS681970-supplement-Supplemental_Digital_Content_4.pdf]

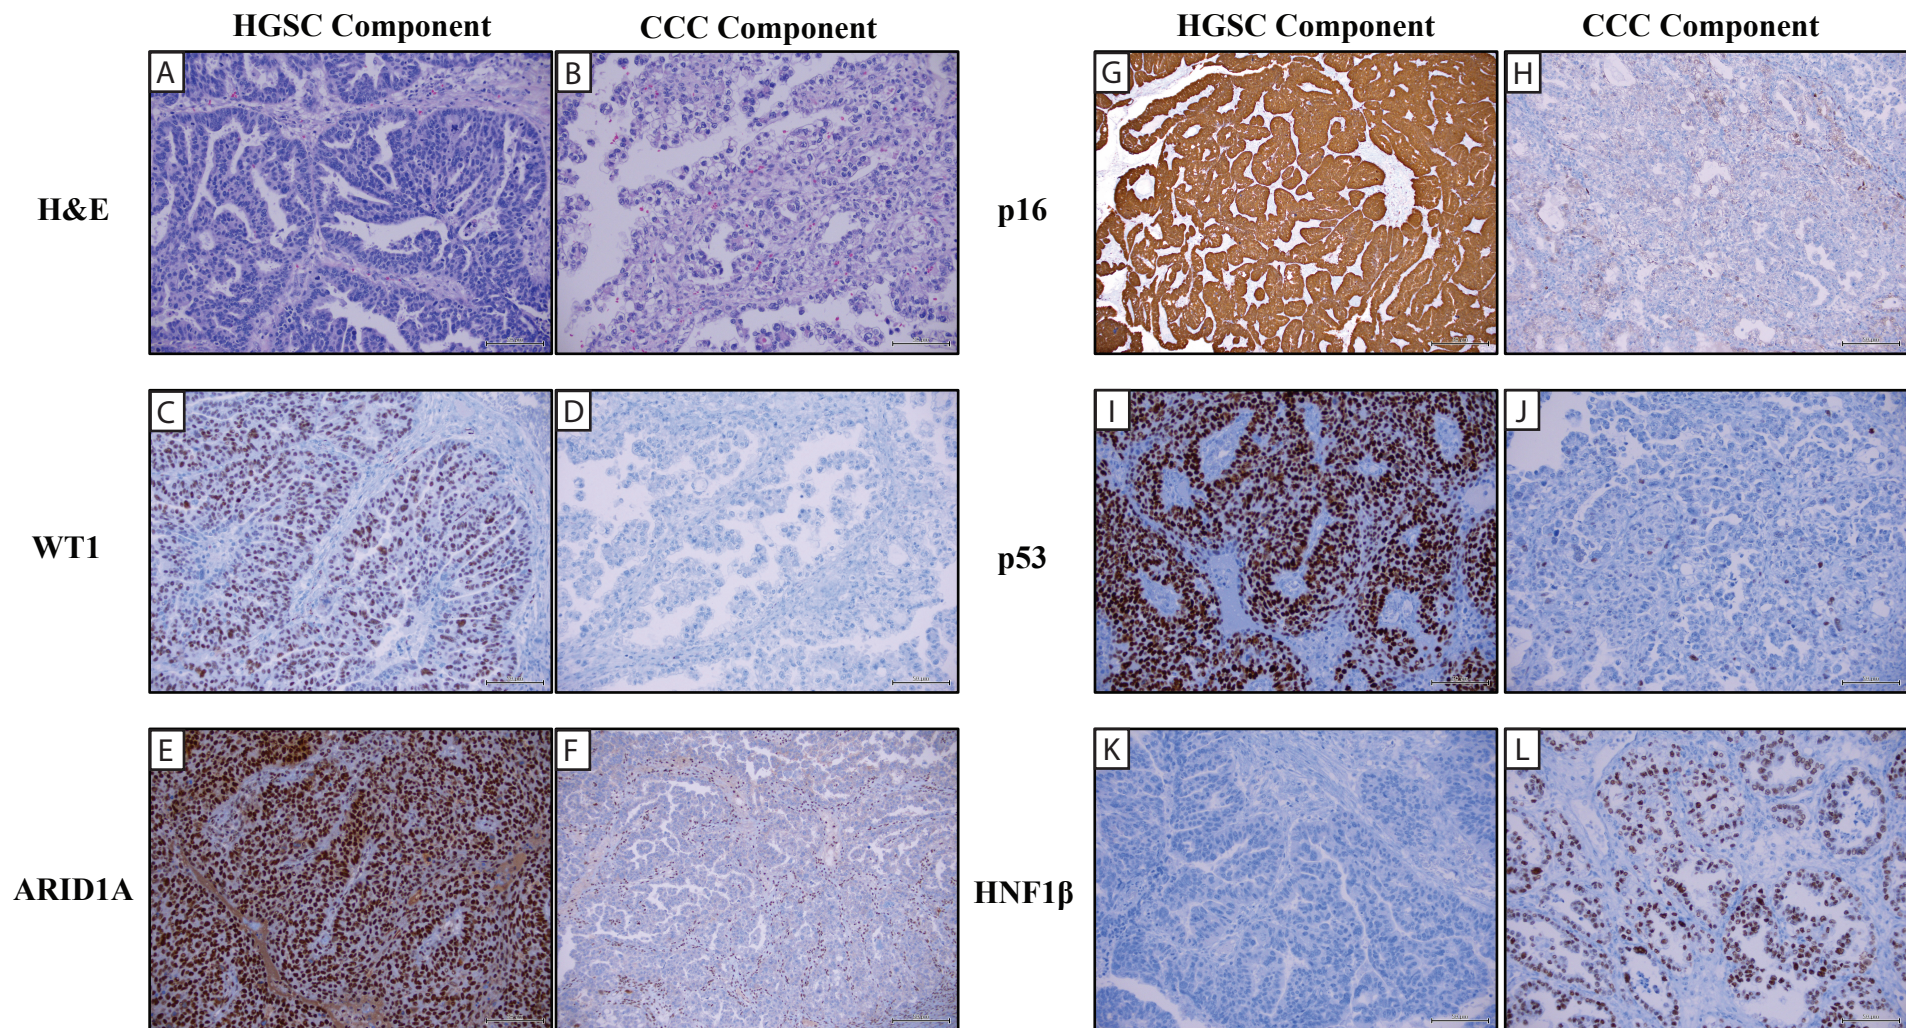

Supplement: NIHMS681970-supplement-Supplemental_Digital_Content_5.pdf [file NIHMS681970-supplement-Supplemental_Digital_Content_5.pdf]
